# Supplementary material for: Level of self-care practice among diabetic patients in Ethiopia: a systematic review and meta-analysis
Source: BMC Public Health. 2020 Mar 12;20:309. doi: 10.1186/s12889-020-8425-2 (PMC7068935; doi:10.1186/s12889-020-8425-2)
Supplement: Supplementary file 4 — Additional File 4. Physical activity data set. [file 12889_2020_8425_MOESM4_ESM.xlsx]

## Sheet: Sheet1
number	Authors name	publication year	Region	Study area	Study design	Sample size	No of people with good phyisical activity outcome	P
1	Kassahun, T., et al.	2016	oromia	JUTH	cross-sectional	309	152	49.2
2	Hailu, E., et al.	2012	Oromia	JUTH	Cross-sectional	343	222	64.9
3	Ayele k,et al.	2012	Harari	Harari	cross-sectional	222	69	31.1
4	Dedefo, M.G., et a	2019	oromia	Nekemte Referral Hospital	cross-sectional	252	160	63.5
5	Bonger, Z,et al.	2018	Addis Abeba	Tikur Ambesa hospital	cross-sectional	419	194	46.3
6	Mariam, T.G., et al	2017	Amhara	UOGRH	cross-sectional	279	228	81.7
7	Addisu,Y,et al.	2014	SNNP	Dilla hospital	cross-sectional	310	138	44.5
8	Tegegne, G.T., et al.	2015	oromia	Ambo hospital	cross-sectional	111	20	18
9	Sorato, M.et al.	2016	SNNP	Arbaminch hospital	cross-sectional	194	98	50.5
10	Tamirat, A.et al	2014	oromia	JUTH	cross-sectional	319	38	11.9
11	Woldu, M., et al	2014	oromia	Ambo hospital	cross-sectional	102	51	50
12	Berhe, K,et al.	2017	Tigray	ayider and mekele hospital	cross-sectional	310	229	74
13	Aklilu, T., et al.	2014	Amhara	DESSIE RH	cross-sectional	303	139	45.9
14	Tekalegn, Y., et al	2018	Addis Abeba	Tikur Ambesa hospital	Cross-sectional	412	224	54.4
